# Supplementary material for: Molecular Dynamics Simulations Reveal Structural Interconnections within Sec14-PH Bipartite Domain from Human Neurofibromin
Source: MDPI journal article supplement (doi:10.3390/ijms23105707), 2022-05-20
Supplement: s1 [file s1]

# Supplementary information

## Supplementary Tables.

Table S1. Probability of cluster occurrence for the wild type isolated PH domain. Clusters were defined based on backbone atoms RMSD with a cutoff of 2.5 Å.

| Cluster | Cluster occurrence (%) |
|---------|------------------------|
| 1       | 69.97                  |
| 2       | 9.36                   |
| 3       | 6.67                   |
| 4       | 4.66                   |
| 5       | 1.77                   |
| 6       | 1.49                   |
| 7       | 1.38                   |
| 8       | 1.26                   |
| 9       | 1.25                   |
| 10      | 0.52                   |
| 11      | 0.29                   |
| 12      | 0.28                   |
| 13      | 0.22                   |
| 14      | 0.19                   |
| 15      | 0.18                   |
| 16      | 0.17                   |
| 17      | 0.11                   |
| 18      | 0.06                   |
| 19      | 0.05                   |
| 20      | 0.03                   |
| 21      | 0.03                   |
| 22      | 0.02                   |
| 23      | 0.02                   |
| 24      | 0.01                   |
| 25      | 0.01                   |

Table S2. Probability of cluster occurrence for the K1750Δ isolated PH domain. Clusters were defined based on backbone atoms RMSD with a cutoff of 4 Å.

| Cluster | Cluster occurrence (%) |
|---------|------------------------|
| 1       | 63.71                  |
| 2       | 8.42                   |
| 3       | 7.07                   |
| 4       | 5.86                   |
| 5       | 3.47                   |
| 6       | 2.45                   |
| 7       | 2.07                   |
| 8       | 2.03                   |
| 9       | 1.16                   |
| 10      | 0.99                   |
| 11      | 0.53                   |
| 12      | 0.43                   |
| 13      | 0.32                   |
| 14      | 0.26                   |
| 15      | 0.21                   |
| 16      | 0.17                   |
| 17      | 0.15                   |
| 18      | 0.14                   |
| 19      | 0.12                   |
| 20      | 0.10                   |
| 21      | 0.08                   |
| 22      | 0.05                   |
| 23      | 0.05                   |
| 24      | 0.03                   |
| 25      | 0.03                   |
| 26      | 0.03                   |
| 27      | 0.03                   |
| 28      | 0.02                   |
| 29      | 0.01                   |
| 30      | 0.01                   |

## Supplementary Figures

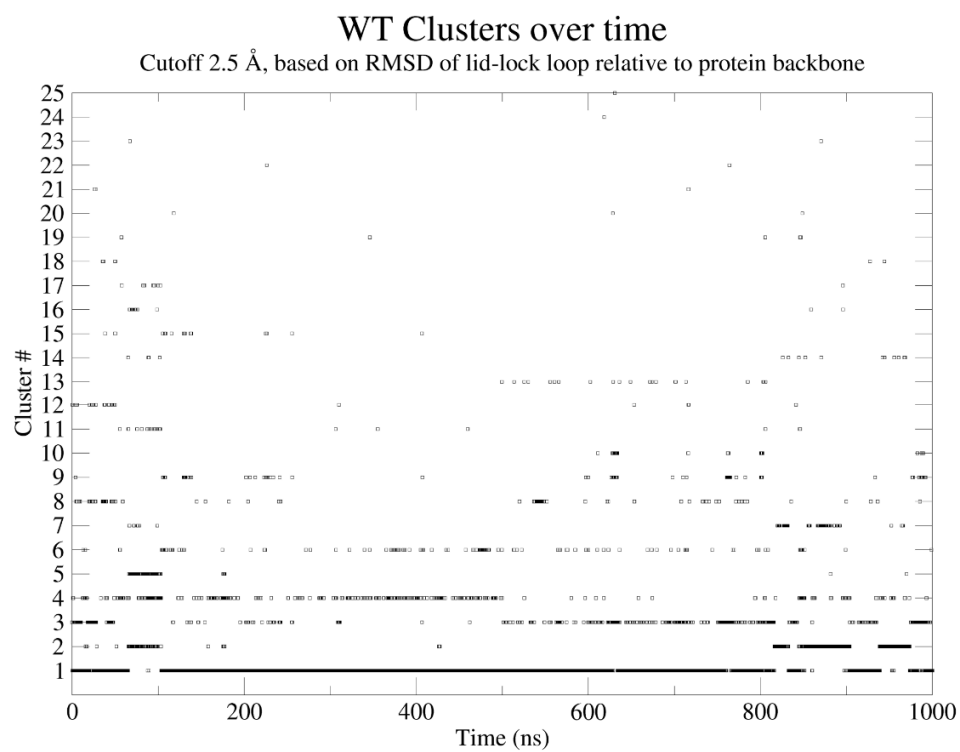

Figure S1. Wild-type MD simulation clusters distribution over the trajectory

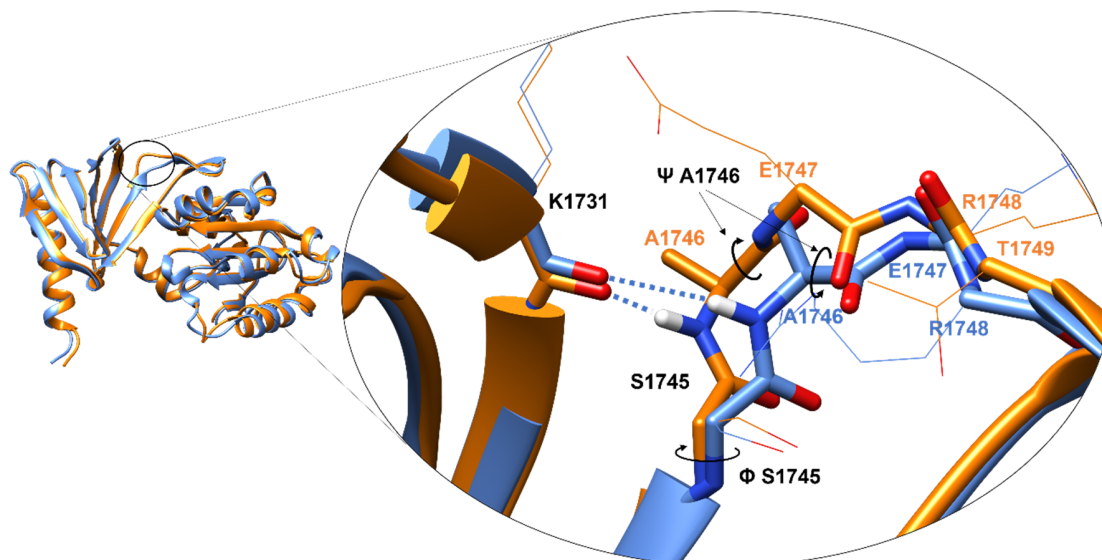

Figure S2: Superposition of the wild-type and K1750 $\Delta$  mutant Sec14PH domain structures. Despite the deletion being located at residue 1750, the lid-lock backbone of K1750 $\Delta$  (blue) gets distorted when compared to the WT (red) starting from the residue S1745. In fact, a different  $\phi$  dihedral ( $-68^\circ$  in the WT vs  $-104^\circ$  in the mutant) induces the A1746 main chain NH of the mutant to move further from the K1731 main chain carbonyl oxygen with respect to the wild-type structure. This causes the H—O distance to stretch from 1.638 Å in the WT to 2.605 Å in the mutant and the O—H—N angle to tighten from  $172^\circ$  to  $152^\circ$ , with an overall weakening of the H-bond. The subsequent rotation change in the A1746  $\psi$  dihedral from  $-19^\circ$  in the WT to  $173^\circ$  in the mutant allows the recovery of the structural alignment of the backbone to the wild-type structure and the correct fold of the lid-lock loop.

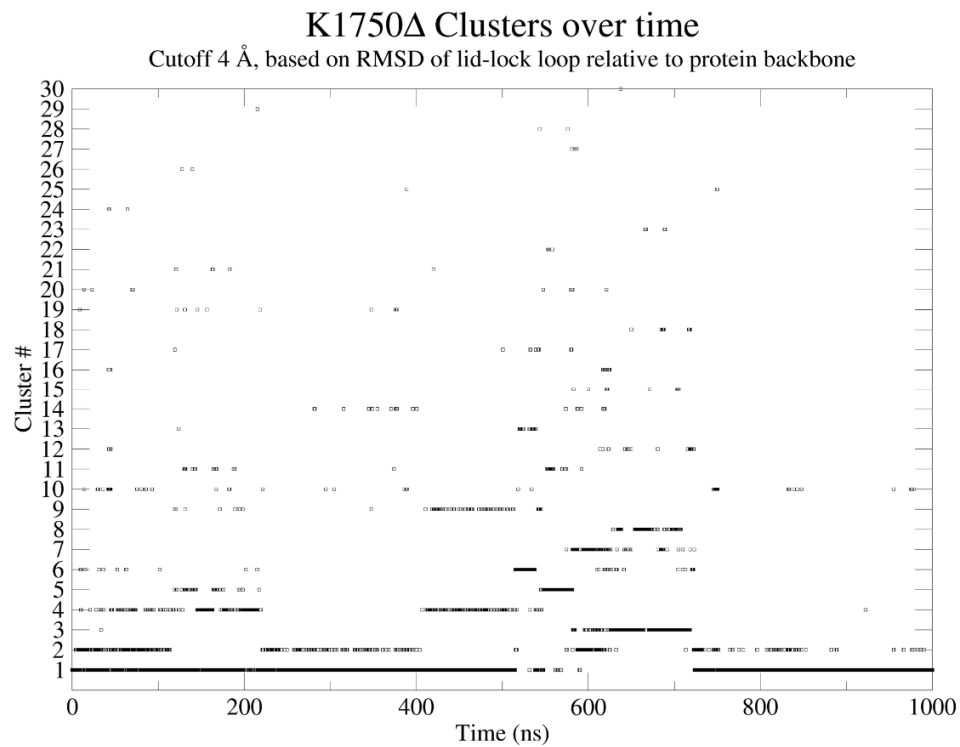

Figure S3. K1750Δ mutant MD simulation clusters distribution over the trajectory.

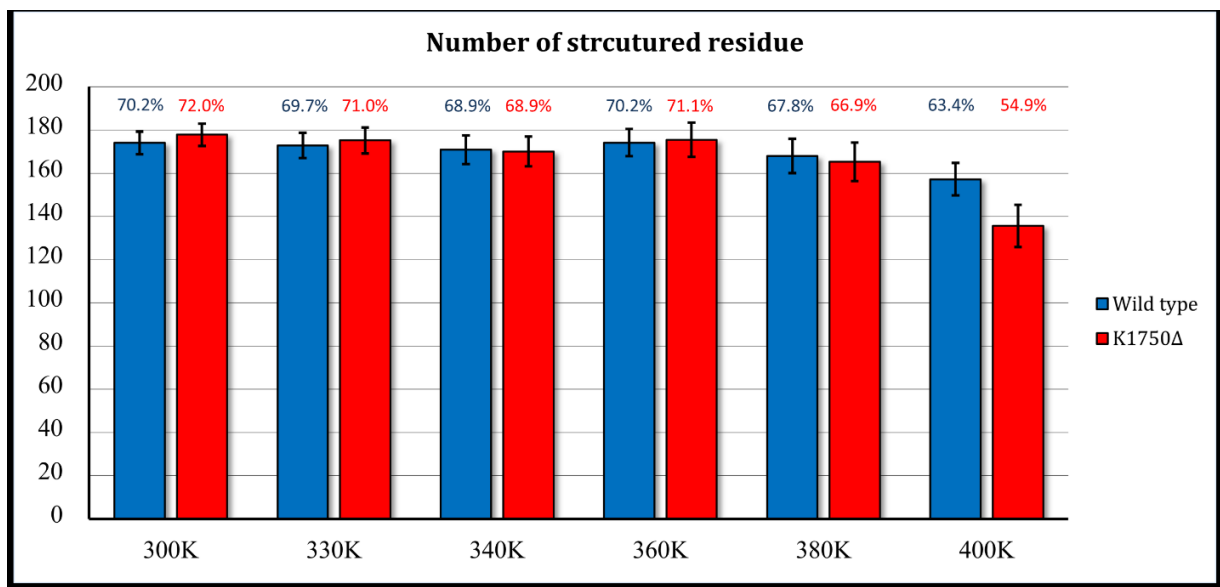

Figure S4. Percentage of secondary structure at different temperatures, for wt and mutant Sec14-PH.

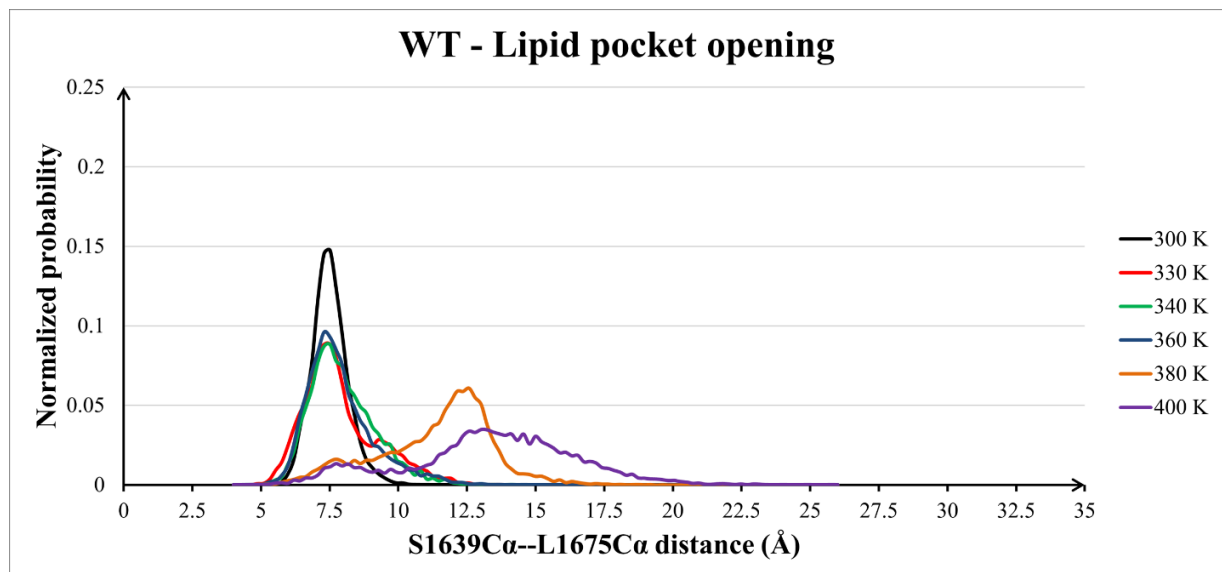

Figure S5. Distributions of the distance between the Cα of S1639 and L1675 as a probe for the opening of the lipid pocket in the wild type Sec1-PH.

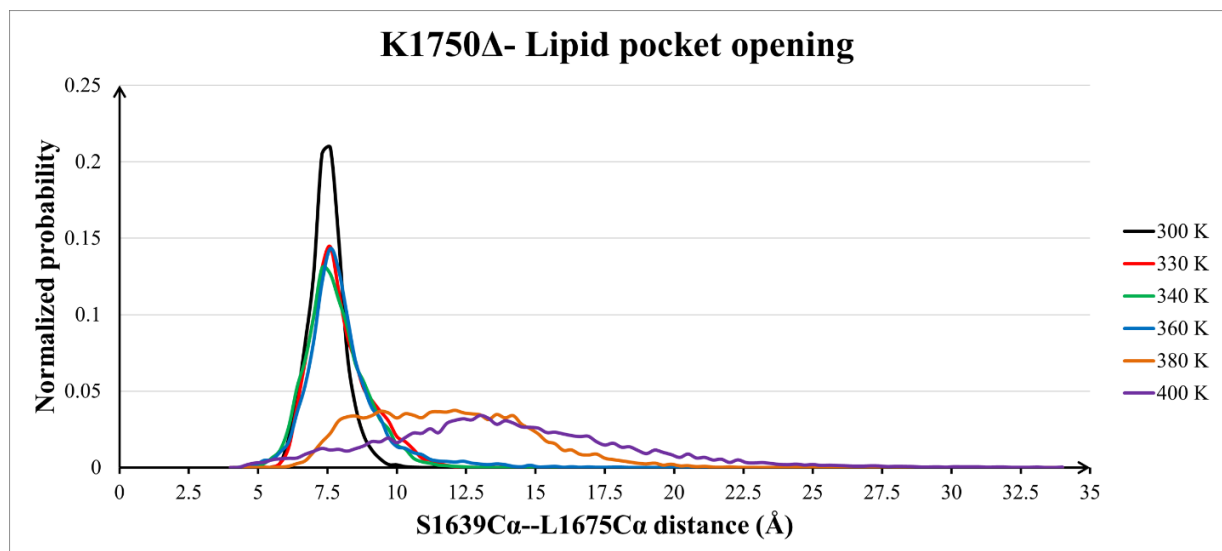

Figure S6. Distributions of the distance between the Cα of S1639 and L1675 as a probe for the opening of the lipid pocket in the K1750Δ mutant Sec1-PH.

## Supplementary Movies.

Video S1. Proposed model for lipid pocket opening in the wild-type Sec14-PH domain. The trajectory is an interpolation between the crystal structure and a frame at 400K showing an open lipid cage conformation while preserving the secondary structures.

Video S2. Proposed model for lipid pocket opening in the K1750 $\Delta$  mutant Sec14-PH domain. The trajectory is an interpolation between the crystal structure and a frame at 400K showing an open lipid cage conformation while preserving the secondary structures.
